# Supplementary material
Source: PubMed Central journal article supplement (PMC3221483)
Supplement: NIHMS333121-supplement-01.pdf [file NIHMS333121-supplement-01.pdf]

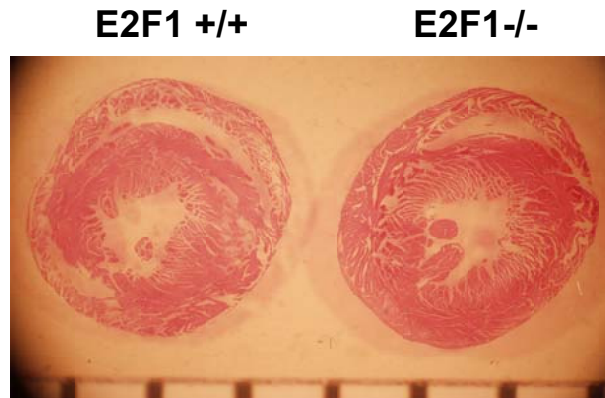

**Figure S1.** HE staining of normal E2F-1<sup>+/+</sup> and E2F-1<sup>-/-</sup> mouse hearts. the size, structure and wall thickness of left and right ventricle are similar between E2F-1<sup>+/+</sup> and E2F-1<sup>-/-</sup> mice.
