# Supplementary material
Source: PubMed Central journal article supplement (PMC3221483)
Supplement: NIHMS333121-supplement-02.pdf [file NIHMS333121-supplement-02.pdf]

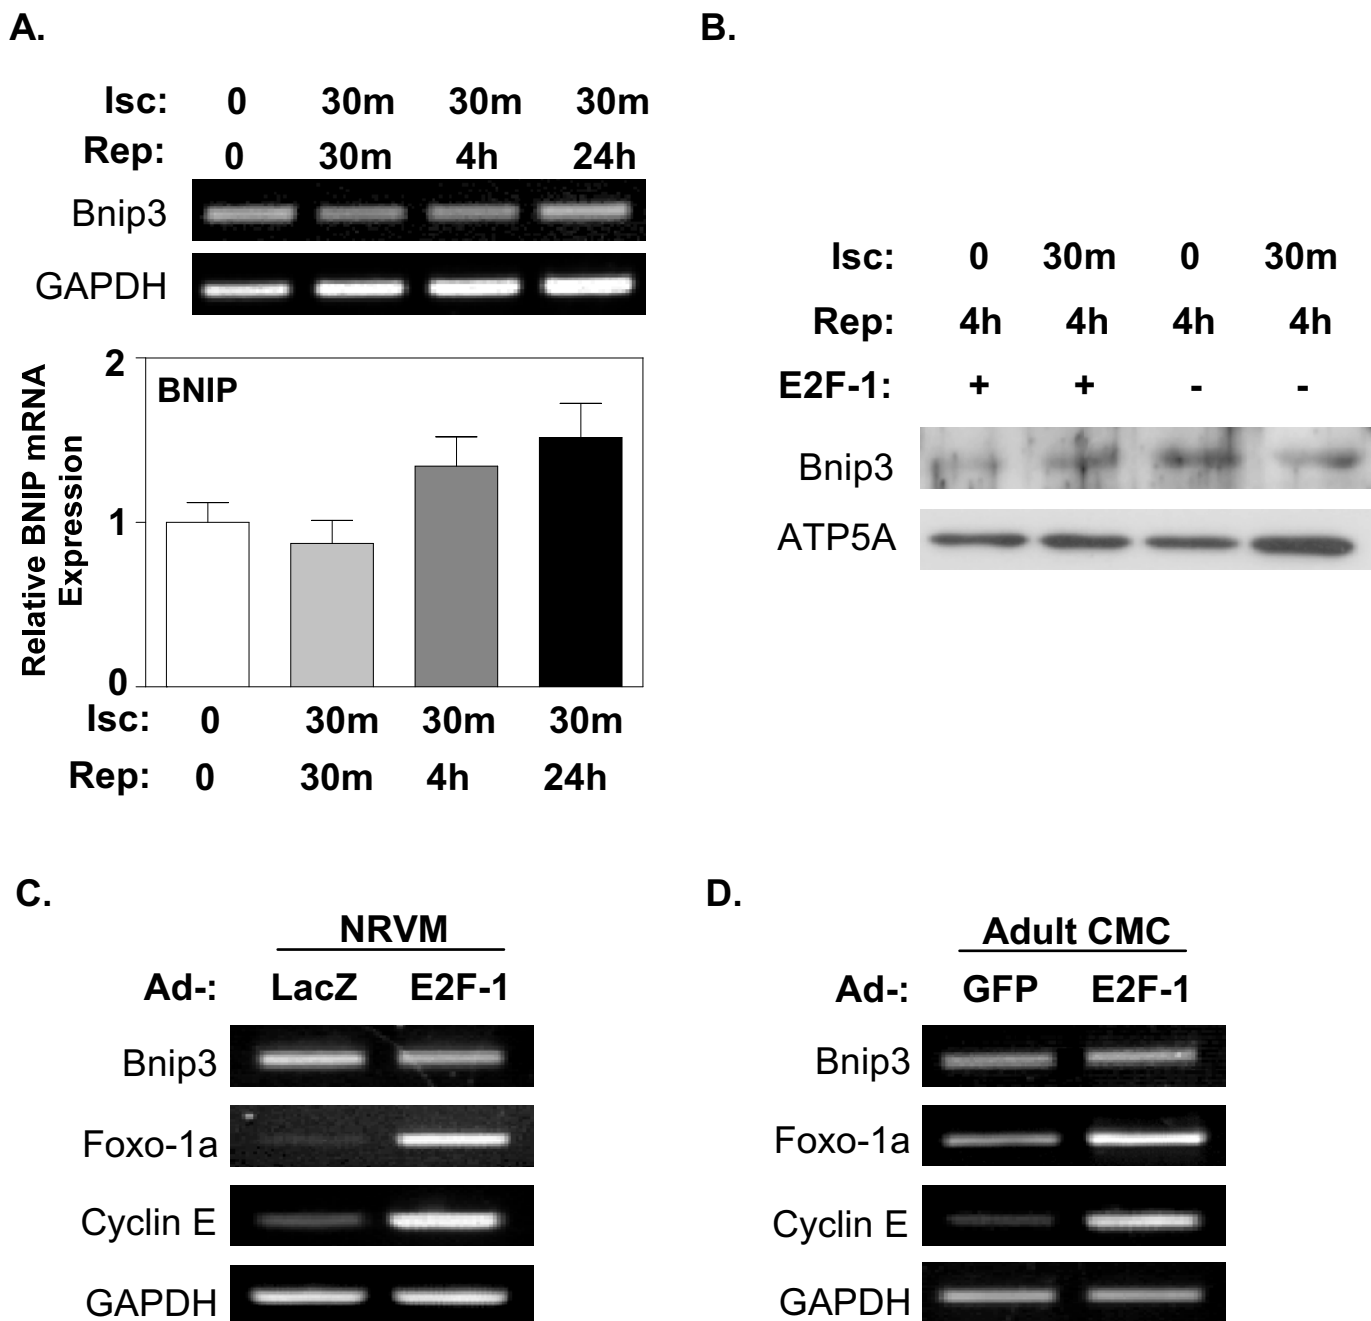

**Figure S2.** Bnip3 expression during I/R injury. A, Semi-quantitative PCR and quantification via real-time PCR analysis of Bnip3 mRNA expression in wildtype mouse heart after 30m, 4h and 24h of reperfusion. n=4 for each group. B, Western blot analysis of mitochondrial Bnip3 protein levels in E2F-1<sup>+/+</sup> and E2F-1<sup>-/-</sup> mice after I/R injury. C and D, Semi-quantitative PCR analyses of Bnip3, FoxO-1a and Cyclin E mRNA expression in NRVMs and ACMs infected with control (Ad-LacZ or -GFP) or Ad-E2F-1virus.
