# Supplementary material
Source: PubMed Central journal article supplement (PMC3221483)
Supplement: NIHMS333121-supplement-03.pdf [file NIHMS333121-supplement-03.pdf]

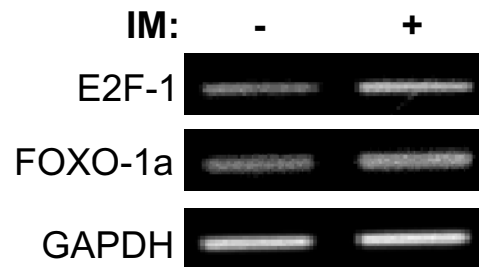

**Figure S3.** Simulated ischemia induces E2F-1 and FoxO-1a mRNA expression in vitro. Isolated adult mouse cardiomyocytes (ACMs) were treated with ischemia media (IM) for 45m then placed back into normal culture conditions for 4h. Exposure to IM led to an increase in both E2F-1 and FoxO-1a mRNA levels.
