# Supplementary material
Source: PubMed Central journal article supplement (PMC3221483)
Supplement: NIHMS333121-supplement-05.pdf [file NIHMS333121-supplement-05.pdf]

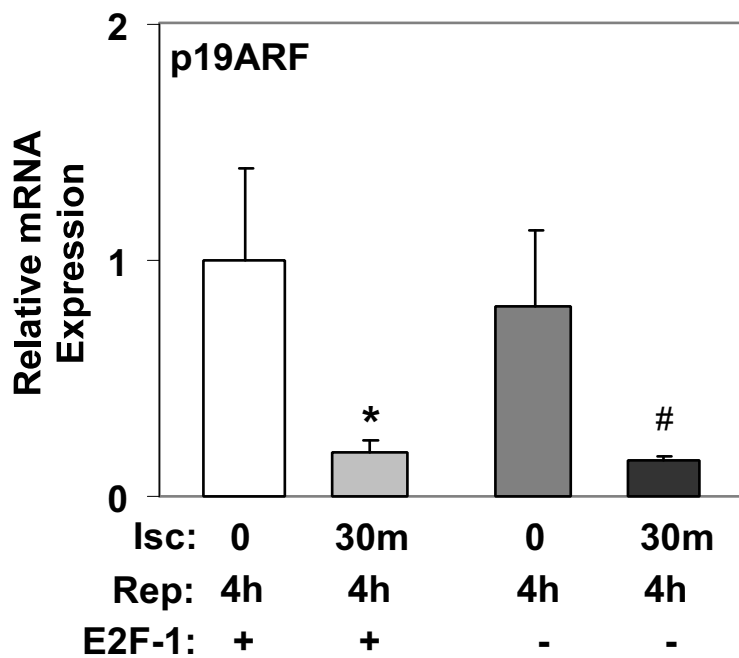

**Figure S5** . Expression of p19<sup>ARF</sup> in ventricular tissue after I/R injury. Quantification via real-time PCR analysis revealed p19<sup>ARF</sup> mRNA levels were decreased in both E2F-1<sup>+/+</sup> and E2F-1<sup>-/-</sup> myocardium 4h after reperfusion (n=3 per group), \*,#*P*<0.05 when compare to respective genotype without ischemia. There were no difference in p19<sup>ARF</sup> mRNA in E2F-1<sup>+/+</sup> and E2F-1<sup>-/-</sup> hearts when compared under either condition.
