# Supplementary material
Source: PubMed Central journal article supplement (PMC3221483)
Supplement: NIHMS333121-supplement-06.pdf [file NIHMS333121-supplement-06.pdf]

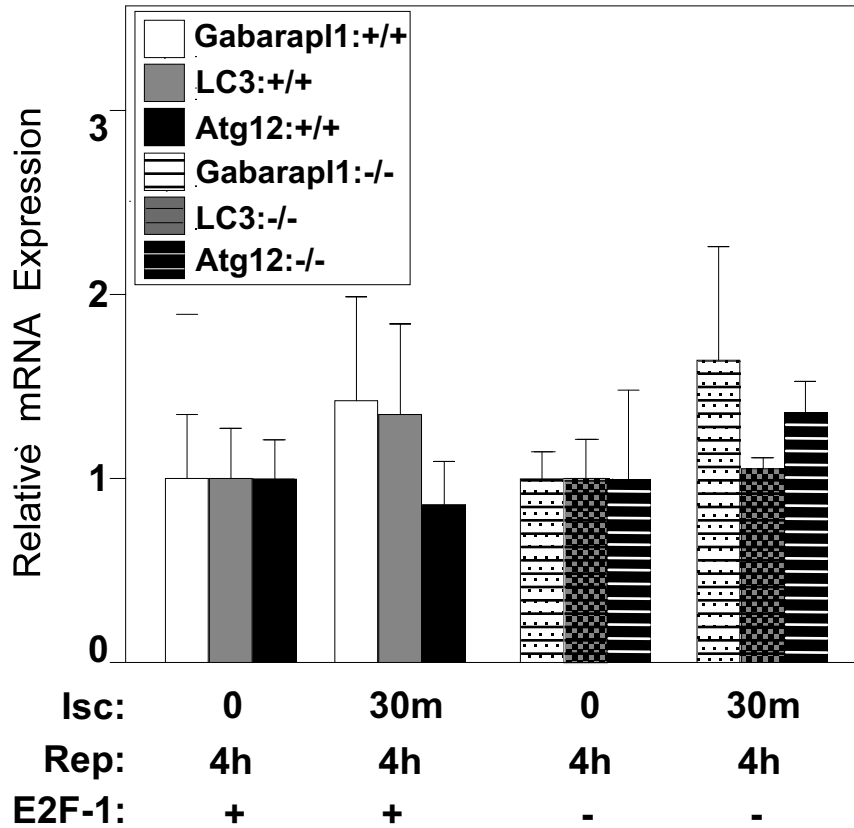

**Figure S6.** Autophagy-related genes are not altered in E2F-1<sup>+/+</sup> and E2F-1<sup>-/-</sup> mice after I/R injury. Quantification via real-time PCR analyses of Gabarapl1, LC3 and Atg12 mRNA expression in E2F-1 hearts after I/R injury. Minimal changes in mRNA expression were noted between genotypes or in response to I/R. n=3-4 per group.
