# Supplementary material
Source: PubMed Central journal article supplement (PMC3221483)
Supplement: NIHMS333121-supplement-07.pdf [file NIHMS333121-supplement-07.pdf]

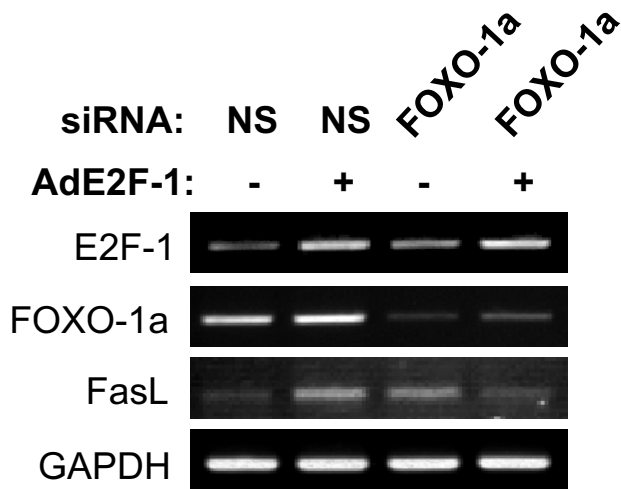

**Figure S7.** FoxO-1a is required for E2F-1 induced expression of FasL in vitro. Semi-quantitative PCR analyses of E2F-1, FoxO-1a and FasL mRNA expression in NRVMs. Cells were transfected with NS or FoxO-1a siRNA where indicated followed by infection with either control (Ad-LacZ) or Ad-E2F-1 viruses. Forced expression of E2F-1 is able to induce the mRNA expression of FasL. When FoxO-1a is silenced, E2F-1's effect on FasL levels is abrogated.
