# Supplementary material
Source: PubMed Central journal article supplement (PMC3221483)

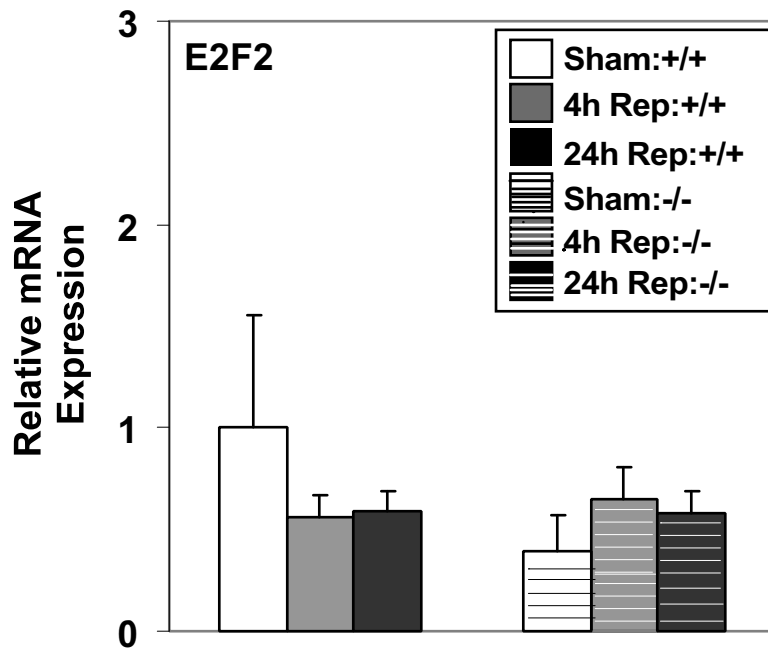

**Figure S4.** E2F-2 mRNA expression is not altered in E2F-1 <sup>+/+</sup> and E2F-1 <sup>-/-</sup> mice after I/R injury.

Supplement: NIHMS333121-supplement-04.pdf [file NIHMS333121-supplement-04.pdf]
